# Supplementary material for: A novel facile and fast hydrothermal-assisted method to synthesize sulfur/carbon composites for high-performance lithium–sulfur batteries
Source: Royal Society of Chemistry journal article supplement (doi:10.1039/c6ra19613f), 2016-01-01
Supplement: c6ra19613f1.pdf [file c6ra19613f1.pdf]

## Supplementary Information

### **A Novel Facile and Fast Hydrothermal-assisted Method to Synthesize Sulfur/Carbon Composite for High-Performance Lithium-Sulfur Batteries**

*Yuqing Chen,<sup>a,b</sup> Xiaofei Yang,<sup>a,b</sup> Kai Feng,<sup>a</sup> Hongzhang Zhang,<sup>\*a,c</sup> Xianfeng Li<sup>a,c</sup> and Huamin Zhang<sup>\*a,c</sup>*

<sup>a</sup> Division of Energy Storage, Dalian Institute of Chemical Physics, Chinese Academy of Sciences, Zhongshan Road 457, Dalian 116023, China

<sup>b</sup> University of Chinese Academy of Sciences, Beijing 100049 China

<sup>c</sup> Collaborative innovation Center of Chemistry for Energy Materials (iChEM), Dalian 116023, China.

## Calculation of theoretical sulfur content

The theoretical weight of sulfur for per gram of KB ( $W$ ) can be calculated by the formula as follow:

$$W = \frac{V_0 \cdot d_s}{1 + \alpha_s} \quad (1)$$

Where  $V_0$  stands for total pore volume of KB ( $2.56 \text{ cm}^3 \text{ g}^{-1}$ , obtained from Table 1),  $d_s$  is the density of sulfur ( $1.96 \text{ g cm}^3$ ),  $\alpha_s$  is the coefficient of sulfur volumetric expansion ( $\sim 0.8$ ).

Therefore, the theoretical weight of sulfur for per gram of KB was 2.8 g, corresponding to the theoretical sulfur content of 73.6 wt. %.

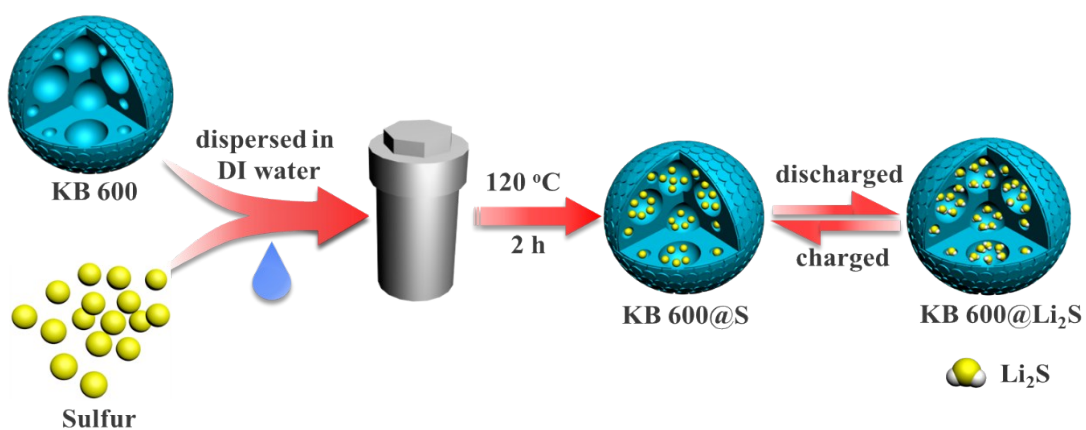

**Figure S1.** Schematic of the synthesis process of the H-S@C composite.

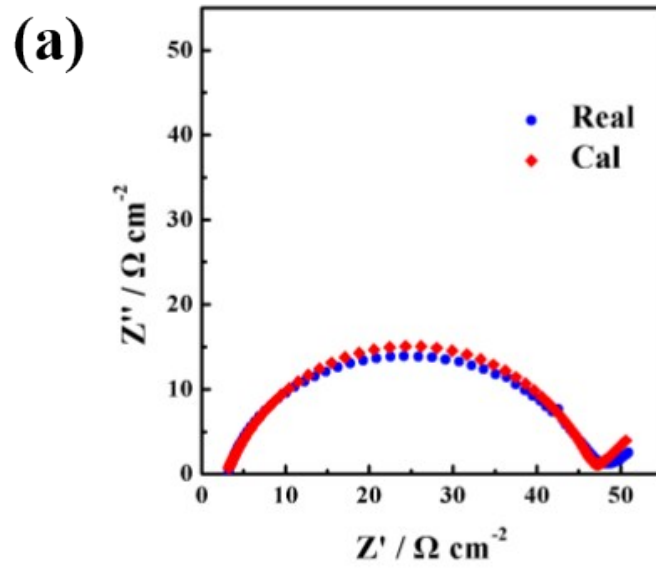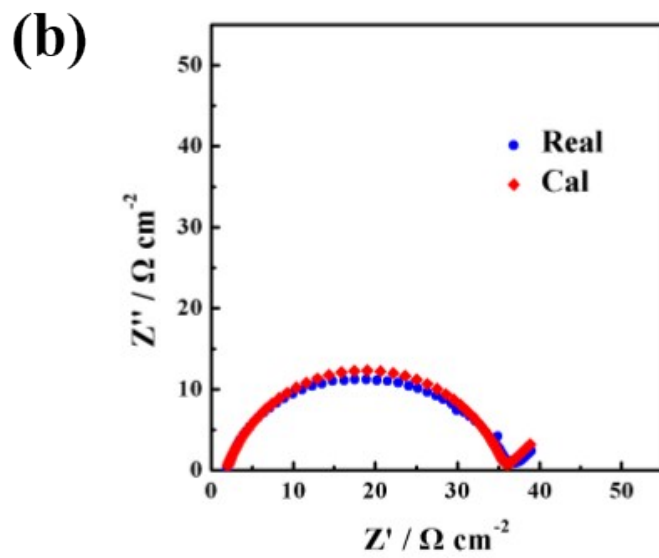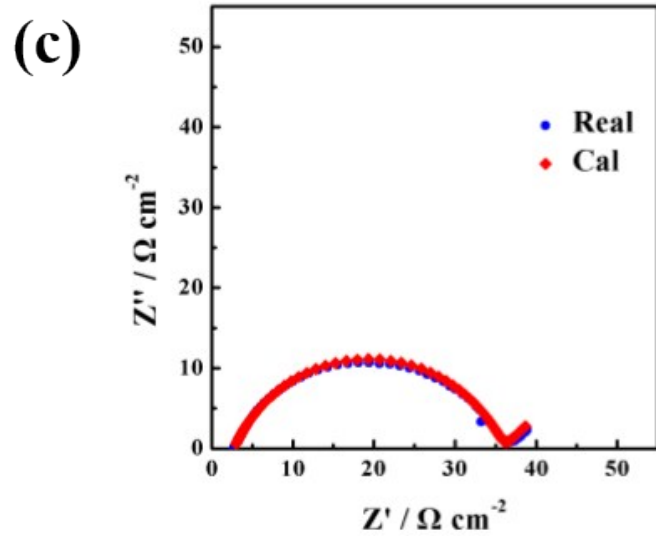

**Figure S2.** Fitted EIS curves of the G-S@C (a), M-S@C (b) and H-S@C (c) electrodes before cycling.

**Table S1. The cell performance comparison of this work with recent publications**

| Carbon materials                      | Preparation method  | Sulfur content | C-rate | Initial discharge capacity (mAh g <sup>-1</sup> ) | Cycling capacity (mAh g <sup>-1</sup> ) |      | ref |
|---------------------------------------|---------------------|----------------|--------|---------------------------------------------------|-----------------------------------------|------|-----|
|                                       |                     |                |        |                                                   |                                         |      |     |
| acetylene black                       | Ball milling        | 60%            | 0.1C   | 1077                                              | 10 <sup>th</sup>                        | 606  | 1   |
| Super P                               | Melting method      | 60%            | 0.1C   | 900                                               | 100 <sup>th</sup>                       | 500  | 2   |
| hierarchical porous-structured carbon | Melting method      | 70%            | 0.2C   | ~1200                                             | 120 <sup>th</sup>                       | ~500 | 3   |
| Graphene                              | chemical synthesis  | 70%            | 0.1C   | ~1100                                             | 100 <sup>th</sup>                       | ~600 | 4   |
| MWCNT/KB                              | Directly mixing     | 50%            | 0.2C   | ~1200                                             | 100 <sup>th</sup>                       | ~580 | 5   |
| KB                                    | Melting method      | 70%            | 0.5C   | ~800                                              | 100 <sup>th</sup>                       | ~400 | 6   |
| KB                                    | Melting method      | 75%            | 0.1C   | ~800                                              | 100 <sup>th</sup>                       | ~600 | 7   |
| KB                                    | Melting method      | 79.3%          | 0.1C   | ~1200                                             | 100 <sup>th</sup>                       | 500  | 8   |
| KB                                    | Melting method      | 80%            | 0.2C   | 1217                                              | 100 <sup>th</sup>                       | 802  | 9   |
| KB                                    | Hydrothermal method | 70%            | 0.2C   | 1239                                              | 100 <sup>th</sup>                       | 825  | 10  |

1. L. Kong, Y. Handa and I. Taniguchi, *Mater. Res. Bull.*, 2016, 73, 164-170.
2. X. Yang, N. Yan, W. Zhou, H. Zhang, X. Li and H. Zhang, *J. Mater. Chem. A*,

2015, 3, 15314-15323.

3. H. Wang, S. Li, D. Li, Z. Chen, H. K. Liu and Z. Guo, *Energy*, 2014, 75, 597-602.

4. K. Jin, X. Zhou and Z. Liu, *Nanomaterials*, 2015, 5, 1481-1492.

5. L. Wang, Y. Zhao, M. L. Thomas and H. R. Byon, *Adv. Funct. Mater.*, 2014, 24, 2248-2252.

6. G. He, C. J. Hart, X. Liang, A. Garsuch and L. F. Nazar, *ACS Appl. Mater. Interfaces*, 2014, 6, 10917-10923.

7. M. Wang, H. Zhang, Q. Wang, C. Qu, X. Li and H. Zhang, *ACS Appl. Mater. Interfaces*, 2015, 7, 3590-3599.

8. J. Zheng, M. Gu, H. Chen, P. Meduri, M. H. Engelhard, J.-G. Zhang, J. Liu and J. Xiao, *J. Mater. Chem. A*, 2013, 1, 8464-8470.

9. J. Zheng, D. Lv, M. Gu, C. Wang, J. G. Zhang, J. Liu and J. Xiao, *J. Electrochem. Soc.*, 2013, 160, A2288-A2292.

10. This work
